# Supplementary material
Source: publisher site journal article supplement (https://www.dovepress.com/article/322105)

|                              |                                                         |                                                                                     |
|------------------------------|---------------------------------------------------------|-------------------------------------------------------------------------------------|
| EvaSys                       | Teacher evaluation form for clinical (bedside) teaching |  |
| Imperial College London      |                                                         | A. Sam / C. Fung / T. Raupach                                                       |
| 3rd Clinical Attachment 2018 |                                                         |                                                                                     |

☐ ☒ ☐ ☐ ☐ Mark your response like this  
☐ ☒ ☐ ☒ ☐ You may correct a mark like this

## Introduction and Instructions

The purpose of this questionnaire is to collect student opinions on the quality of teaching during clinical rotations. The focus of the questionnaire is the individual teacher (not the teaching hospital or the curriculum as a whole). The word 'session' refers to all teaching encounters with the principal teaching fellow you have been assigned to.

**Please enter the code / reference number for your principal teaching fellow (as shown in the presentation):**

Please state your gender.

☐ male      ☐ female      ☐ other  
☐ prefer not to say

## Teaching sessions and teaching fellow performance

This part of the questionnaire consists of 18 items to be rated on a five-point scale. For each item, please tick one box that most adequately reflects your appraisal of the teaching fellow's performance.

|                                                                                                                           | completely disagree      | somewhat disagree        | completely agree         | agree                    | completely agree         |
|---------------------------------------------------------------------------------------------------------------------------|--------------------------|--------------------------|--------------------------|--------------------------|--------------------------|
| The degree of difficulty of the sessions was well adapted to the students' level of knowledge.                            | <input type="checkbox"/> |
| The volume of information covered in the sessions was appropriate.                                                        | <input type="checkbox"/> |
| The sessions were clearly structured.                                                                                     | <input type="checkbox"/> |
| The content covered in the sessions was consistent with the learning objectives presented at the start of the attachment. | <input type="checkbox"/> |
| The sessions provided a good combination of knowledge conveyed by the teaching fellow and active student participation.   | <input type="checkbox"/> |
| I had sufficient opportunities to examine patients during the sessions.                                                   | <input type="checkbox"/> |

### The teaching fellow...

|                                                                                                |                          |                          |                          |                          |                          |
|------------------------------------------------------------------------------------------------|--------------------------|--------------------------|--------------------------|--------------------------|--------------------------|
| ...treated the students with respect.                                                          | <input type="checkbox"/> |
| ...sufficiently responded to the students' questions and participation.                        | <input type="checkbox"/> |
| ...gave the students constructive feedback.                                                    | <input type="checkbox"/> |
| ...stated the principle learning objectives at the beginning of the attachment.                | <input type="checkbox"/> |
| ...gave me personal feedback on my physical examination skills.                                | <input type="checkbox"/> |
| ...delivered the sessions in a way that furthered my personal interest for the subject matter. | <input type="checkbox"/> |
| ...gave me sufficient opportunities to apply my theoretical knowledge clinically.              | <input type="checkbox"/> |
| ...explained how to interpret the physical examination findings.                               | <input type="checkbox"/> |
| ...practised clinical examination methods with the students.                                   | <input type="checkbox"/> |
| ...illustrated the integration of clinical information and reasoning using patient examples.   | <input type="checkbox"/> |
| ...expressed himself/herself in an understandable way.                                         | <input type="checkbox"/> |
| ...arrived on time.                                                                            | <input type="checkbox"/> |

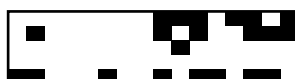

## Learning outcome

In this section, we would like to ask you to self-rate your performance regarding specific learning objectives.

Please provide two separate estimates for each of the following statements:

- First, please provide an estimate of your **current** performance level.
- Second, please provide a **retrospective** estimate of your performance level at the beginning of the 3<sup>rd</sup> clinical attachment.

completely disagree    somewhat disagree    somewhat agree    completely agree  
disagree    agree

**I can take and record a patient's complete medical history (including history of presenting complaint, past medical / medication / family / social / dietary history).**

Current self-rating: ☐ ☐ ☐ ☐ ☐ ☐

Retrospective self-rating (beginning of the 3<sup>rd</sup> clinical rotation): ☐ ☐ ☐ ☐ ☐ ☐

**I can perform and record a comprehensive cardiovascular examination**

Current self-rating: ☐ ☐ ☐ ☐ ☐ ☐

Retrospective self-rating (beginning of the 3<sup>rd</sup> clinical rotation): ☐ ☐ ☐ ☐ ☐ ☐

**I can perform and record a comprehensive respiratory examination.**

Current self-rating: ☐ ☐ ☐ ☐ ☐ ☐

Retrospective self-rating (beginning of the 3<sup>rd</sup> clinical rotation): ☐ ☐ ☐ ☐ ☐ ☐

**I can perform and record a comprehensive abdominal examination.**

Current self-rating: ☐ ☐ ☐ ☐ ☐ ☐

Retrospective self-rating (beginning of the 3<sup>rd</sup> clinical rotation): ☐ ☐ ☐ ☐ ☐ ☐

**I can perform and record a comprehensive nervous system examination (including Glasgow Coma Score).**

Current self-rating: ☐ ☐ ☐ ☐ ☐ ☐

Retrospective self-rating (beginning of the 3<sup>rd</sup> clinical rotation): ☐ ☐ ☐ ☐ ☐ ☐

**I can correctly interpret physical examination findings.**

Current self-rating: ☐ ☐ ☐ ☐ ☐ ☐

Retrospective self-rating (beginning of the 3<sup>rd</sup> clinical rotation): ☐ ☐ ☐ ☐ ☐ ☐

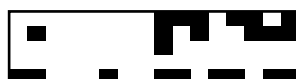

Supplement: Supplementary file 1 [file 322105 Appendix.pdf › 322105 Appendix.pdf]
